# Supplementary material for: The estrogen receptor variants β2 and β5 induce stem cell characteristics and chemotherapy resistance in prostate cancer through activation of hypoxic signaling
Source: PubMed Central journal article supplement (PMC6284737; doi:10.18632/oncotarget.26345), 2018-11-20
Supplement: oncotarget-09-36273-s001.pdf [file oncotarget-09-36273-s001.pdf]

# The estrogen receptor variants $\beta 2$ and $\beta 5$ induce stem cell characteristics and chemotherapy resistance in prostate cancer through activation of hypoxic signaling

## SUPPLEMENTARY MATERIALS

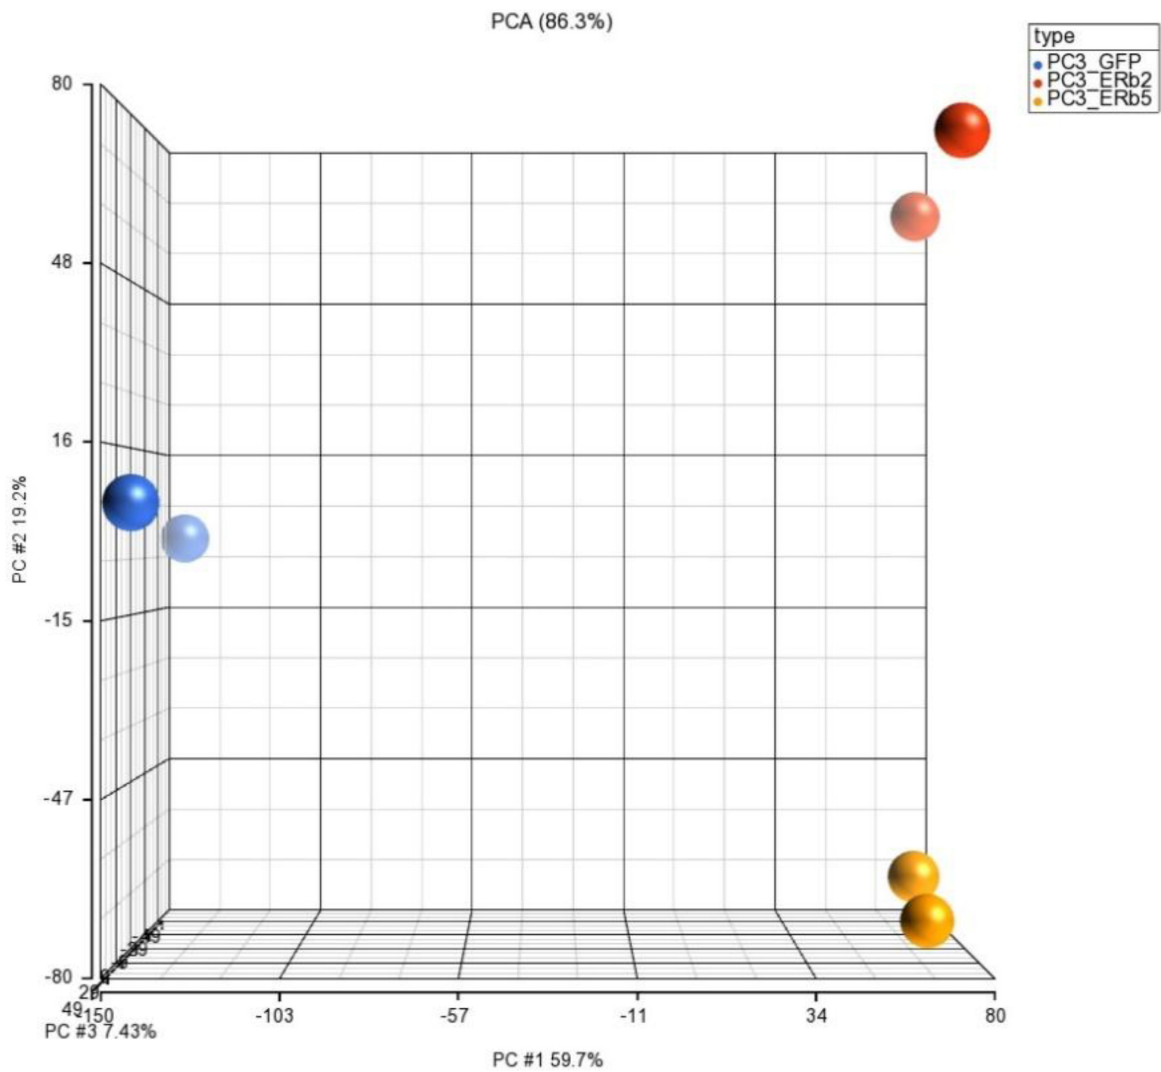

Supplementary Figure 1: Principal component analysis.

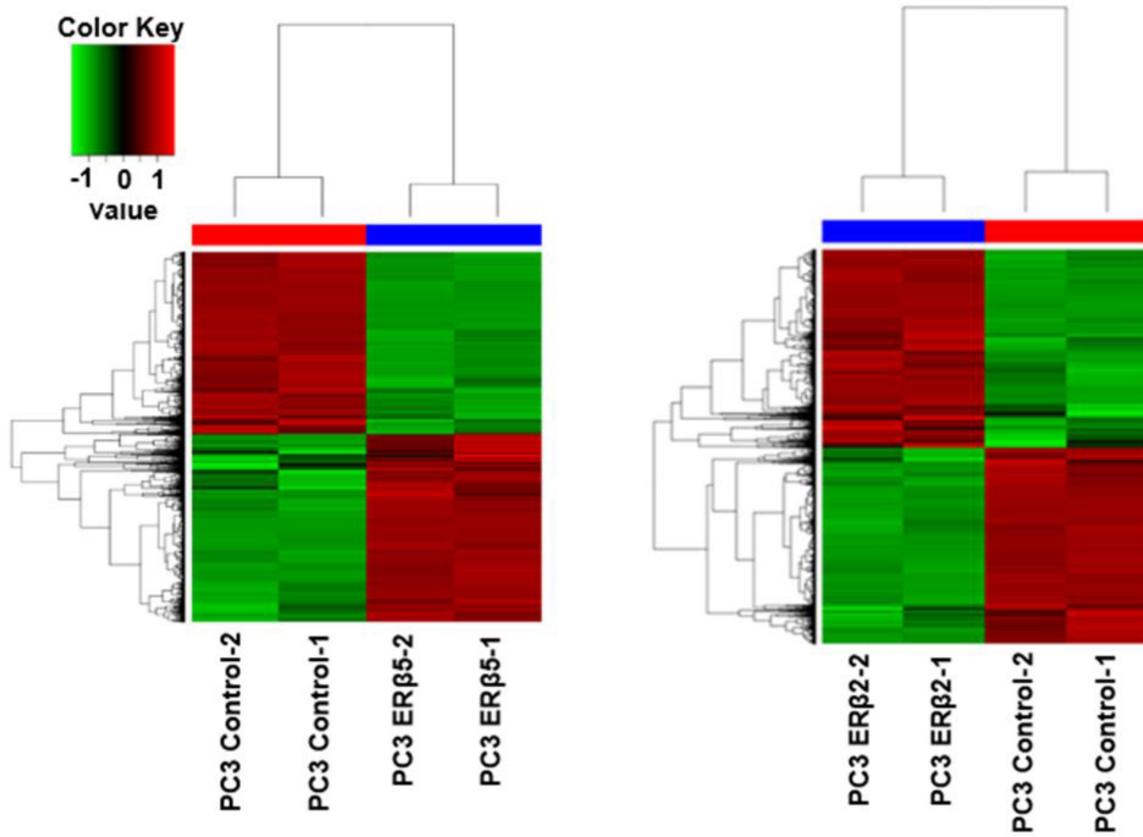

Supplementary Figure 2: Heatmap showing high similarity between repeat samples and big difference between controls and ERβ2/5 expressing cells.

A

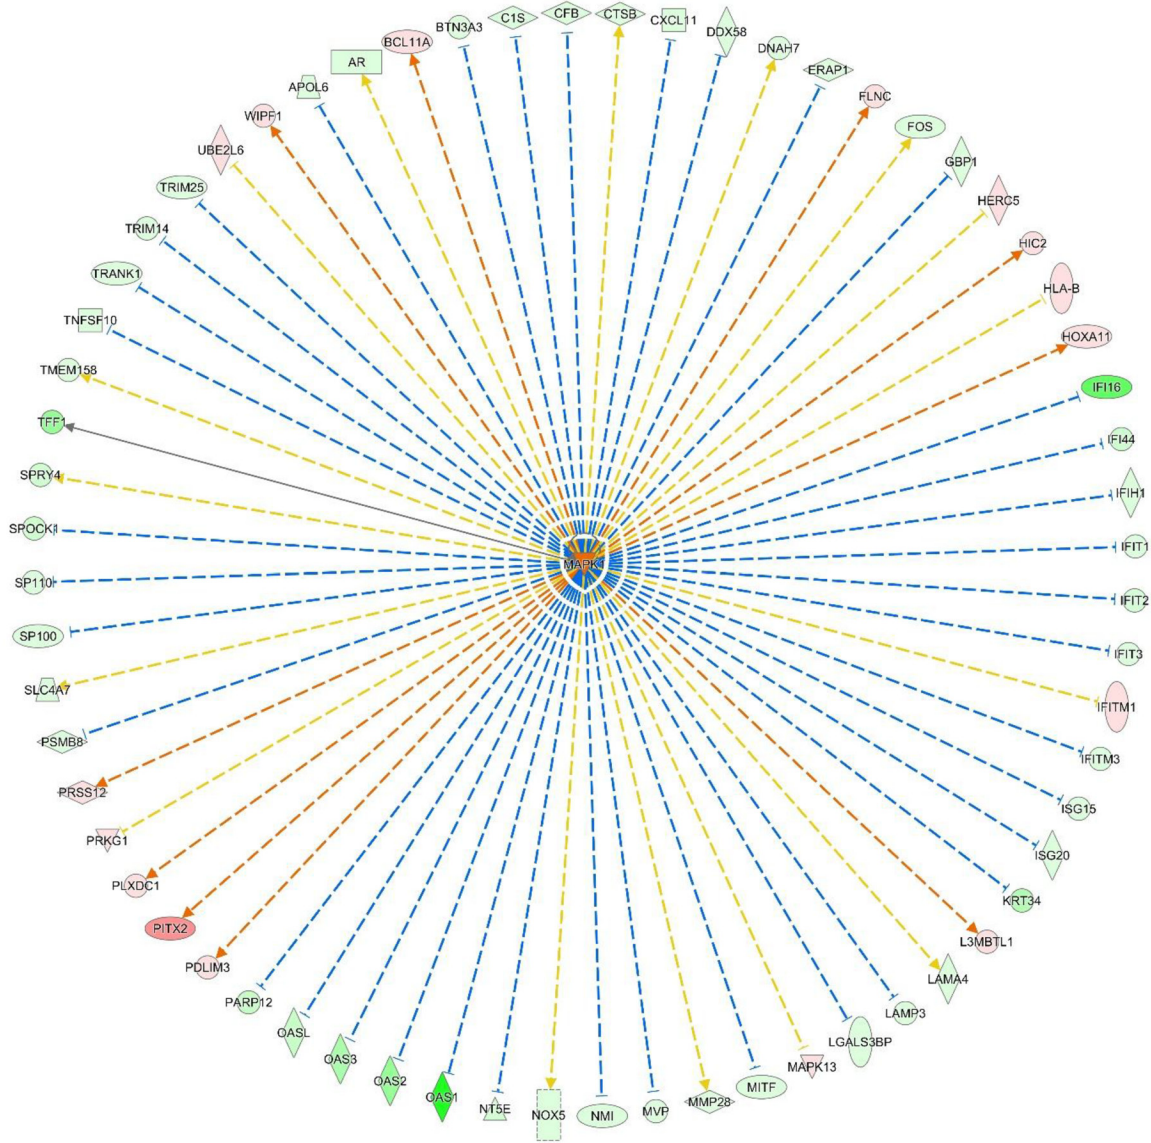

**B**

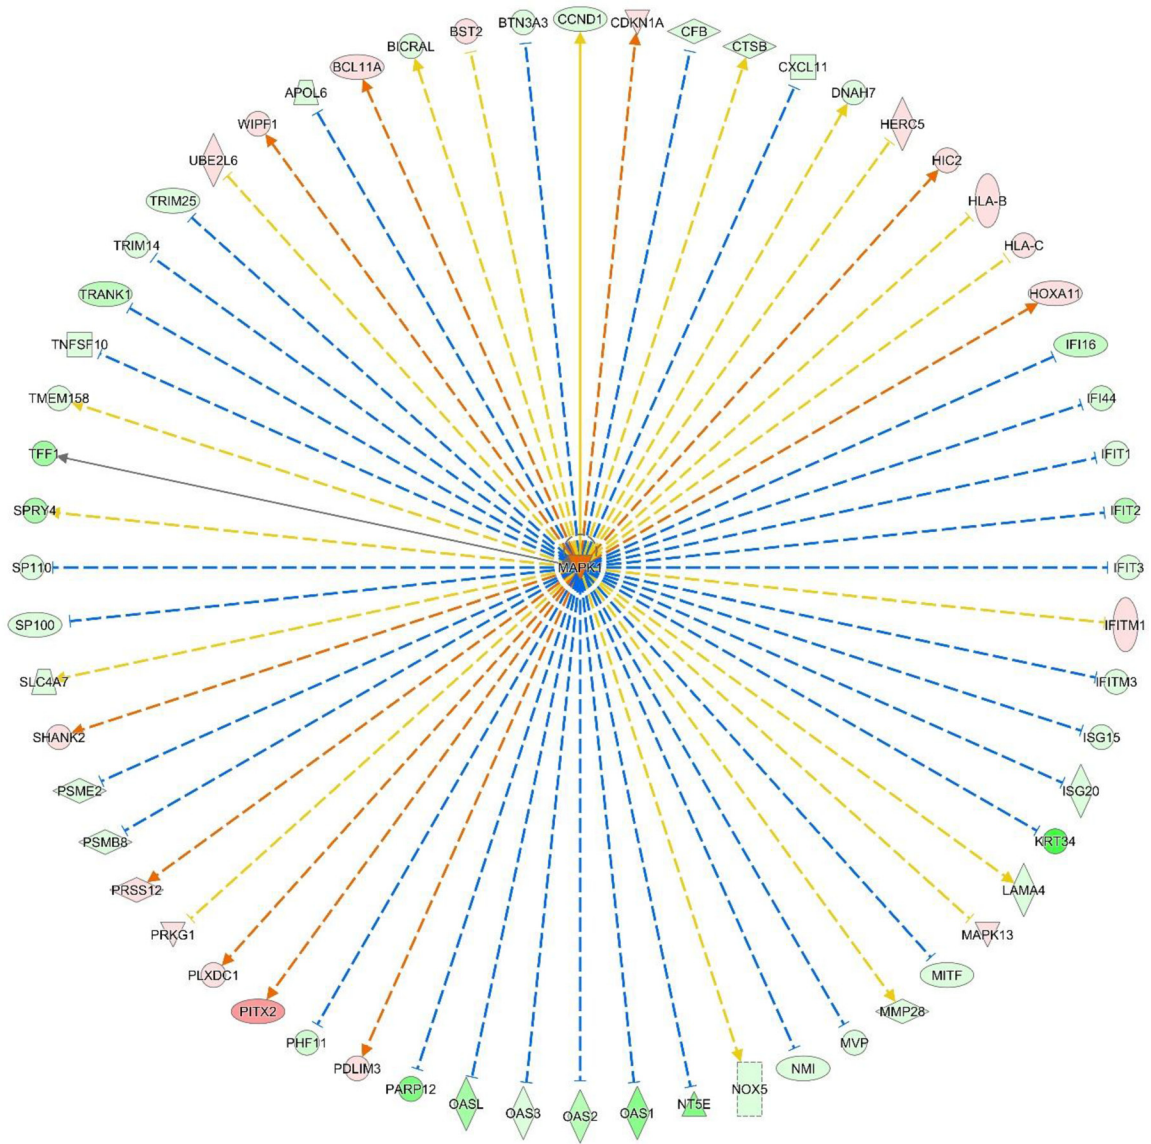

C

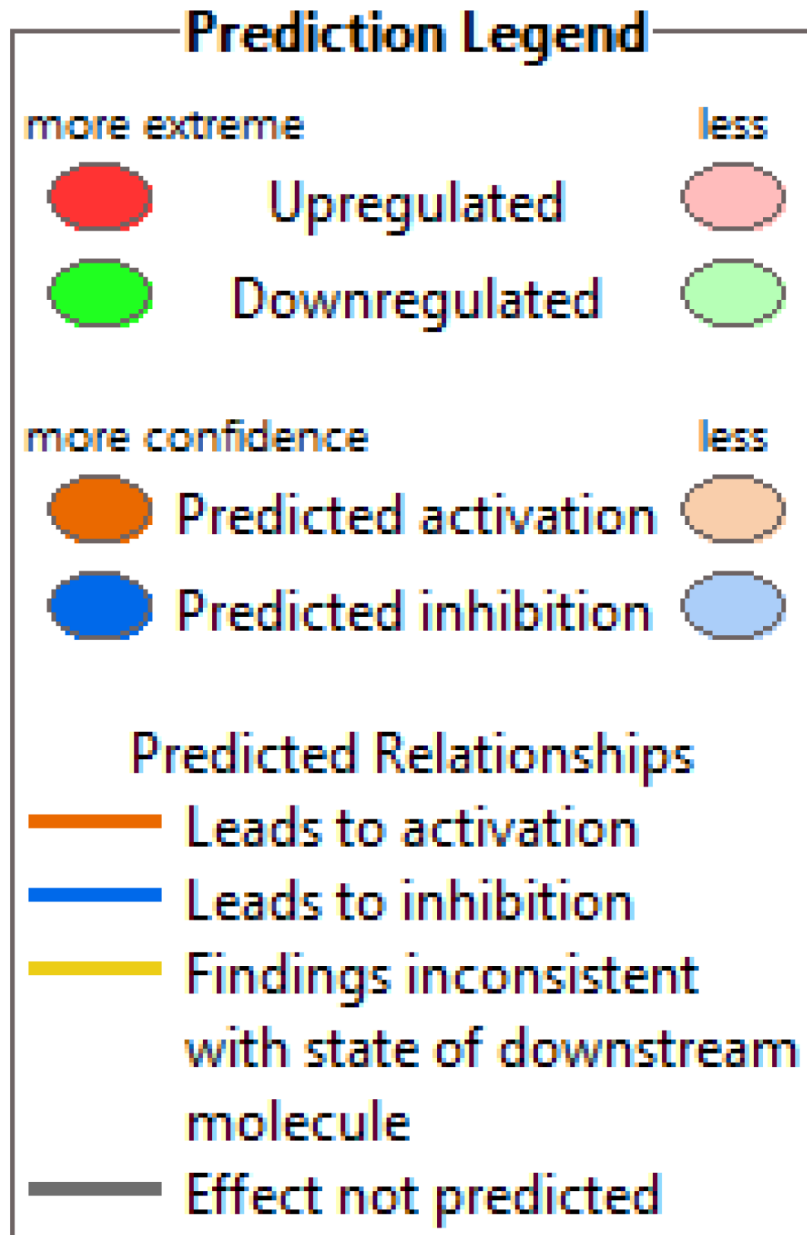

**Supplementary Figure 3:** (A) ER $\beta$ 2 increases MAPK1 signaling. (B) ER $\beta$ 5 increases MAPK1 signaling. (C) Color codes for (A) and (B).

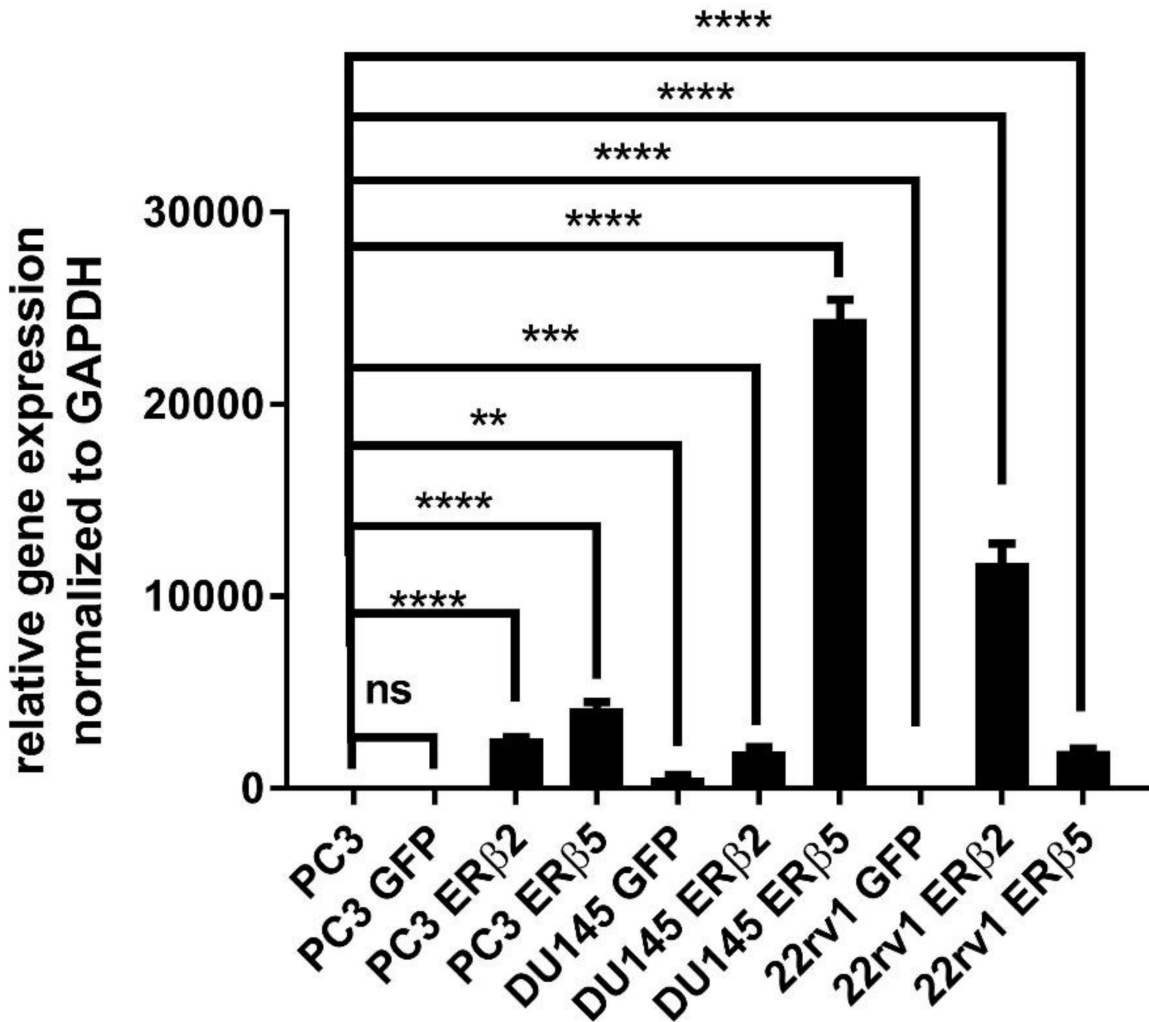

Supplementary Figure 4: ERβ2 and ERβ5 expression in three different prostate cancer stable cell lines.

Supplementary Table 1A: Selected mutually up regulated transcripts. See Supplementary\_Table\_1A

Supplementary Table 1B: Top 30 mutually down regulated transcripts. See Supplementary\_Table\_1B

Supplementary Table 1C: Top 30 up regulated transcripts for ERβ2. See Supplementary\_Table\_1C

Supplementary Table 1D: Top 30 down regulated transcripts for ERβ2. See Supplementary\_Table\_1D

Supplementary Table 1E: Top 30 up regulated transcripts for ERβ5. See Supplementary\_Table\_1E

Supplementary Table 1F: Top 30 down regulated transcripts for ERβ5. See Supplementary\_Table\_1F



**Supplementary Table 2: ER $\beta$  expression in prostate cancer PDX from the MDA PCa PDX series (UT MD Anderson Cancer Center, Texas)**

|    | <b>PDX name:<br/>MDA PCa</b> | <b>Total ER<math>\beta</math><br/>FPKM</b> | <b>Diagnosis &amp; Tumor site</b>                                         | <b>Grade</b> | <b>Therapy</b> | <b>Clinical<br/>state</b> | <b>Survival from<br/>diagnosis<br/>(years)</b> |
|----|------------------------------|--------------------------------------------|---------------------------------------------------------------------------|--------------|----------------|---------------------------|------------------------------------------------|
| 1  | 118-b                        | 0.722384                                   | Metastatic adenocarcinoma, bone                                           | N/A          | HT, CT, RT     | CRPC                      | 2.9                                            |
| 2  | 133-4                        | 0.232289                                   | Metastatic carcinoma, bone                                                | N/A          | HT, CT, RT     | CRPC                      | 8.6                                            |
| 3  | 144-4                        | 3.873795                                   | Adenocarcinoma with NE differentiation and small cell carcinoma, prostate | N/A          | HT, CT, RT     | CRPC                      | 4.8                                            |
| 4  | 149-1                        | 0.714604                                   | Adenocarcinoma, ureter                                                    | 4+5          | HT, CT, RT     | CRPC                      | 6.9                                            |
| 5  | 152-1                        | 0                                          | Metastatic adenocarcinoma (ductal), brain                                 | N/A          | HT, RT         | CRPC                      | 11.4                                           |
| 6  | 173-2                        | 0.037032                                   | Adenocarcinoma, prostate                                                  | 3+4          | None           | N                         | 4                                              |
| 7  | 178-11                       | 0.389715                                   | Adenocarcinoma, prostate                                                  | 4+5          | HT             | Ar                        | 3.4                                            |
| 8  | 183-A                        | 0                                          | Metastatic carcinoma, bone                                                | N/A          | None           | N                         | 2.3                                            |
| 9  | 230-A                        | 0.282839                                   | Metastatic Adenocarcinoma, chest wall                                     | N/A          | HT, CT, RT     | CRPC                      | 10.7                                           |
| 10 | 250-9                        | 0.123058                                   | Metastatic Adenocarcinoma, adrenal gland                                  | N/A          | HT             | Ar                        | 5.7                                            |
| 11 | 259-11                       | 0                                          | Adenocarcinoma, prostate                                                  | 4+5          | None           | N                         | 4                                              |
| 12 | 277-6                        | 0.105902                                   | Metastatic small cell carcinoma, lymph node                               | N/A          | HT, CT, RT     | CRPC                      | 9.9                                            |

Abbreviations: HT = Hormone Therapy, CT = Chemotherapy, RT = Radiotherapy, CRPC = Castration-resistant prostate cancer, Ar = Androgen responsive, N = Naïve, FPKM = Fragments per Kilobase of Exon per Million Fragments Mapped.

**Supplementary Table 3: List of antibodies and source and list of primers used in the study**

| Antibodies     | Source                    | Order number    |
|----------------|---------------------------|-----------------|
| Cyclin D2      | Santa Cruz                | Sc-593          |
| Notch3         | Cell Signaling Technology | D11B8           |
| WNT11          | AbCam                     | Ab31962         |
| ERR $\beta$    | AbCam                     | Ab104804        |
| HIF-1 $\alpha$ | Santa Cruz                | Sc-10790        |
| HIF-2 $\alpha$ | Santa Cruz                | Sc-46691        |
| SCF/Kit        | AbCam                     | Ab52603         |
| ABCG2          | Santa Cruz                | Sc-25822        |
| IKK $\beta$    | Cell Signaling Technology | D30C6           |
| ER $\beta$     | GeneTex                   | GTX70174 (14C8) |
| $\beta$ -actin | Sigma                     | A-1978          |
| ID4            | Santa Cruz                | Sc-365656       |

| Primer  | Forward                     | Reverse                   |
|---------|-----------------------------|---------------------------|
| ABCG2   | 5'AGGTGCAAGGAAAGATCCAA      | 5'TCCAGACACACCACGGATAA    |
| GAPDH   | 5'TGACAACCTTGGTATCGTGG      | 5'AGGCAGGGATGATGTTCTGGA   |
| MDR1    | 5'AGGAAGCCAATGCCTATGACT     | 5'CAACTGGGCCCCTCTCTCTC    |
| LPXN    | 5'ACGCTCCACCCTTCAGGACA      | 5'GACATTGAGCTCCTGGATATTGG |
| PLAT    | 5'CCGGCTACGGCAAGCA          | 5'AGCGGCTGGATGGGTACA      |
| CCDC74A | 5'TCTAATTCAGGCAAGGCCAGG     | 5'AGTAGGGGCTCCTCTTCCAG    |
| HS6ST2  | 5'GAAGCAGAAGTCAGGCAAGG      | 5'CCAATGAAGGAAGCAGGATGT   |
| ITPR1   | 5'CTGCCACCAGTTCAAAAGCC      | 5'CCACCTCTGCTGCCAAGTAA    |
| NEDD9   | 5'GAGCTGGATGGATGACTACGA     | 5'AGCTCTTTCTGTTGCCTCTCA   |
| PLS3    | 5'ACAGAAGAAGACAAGCACAATAACG | 5'CCCATCAAACAGGCAAACACG   |
| SOS1    | 5'GACCAAGCGGGTTGTTATTGA     | 5'TGCCTTGTCGGTCATATTTTTCA |
| CAMK2N1 | 5'GACCAAGCGGGTTGTTATTGA     | 5'TGCCTTGTCGGTCATATTTTTCA |
| HOTAIR  | 5'GGCGGATGCAAGTTAATAAAA     | 5'TACGCTGAGTGTTTCACGAG    |
| XIST    | 5'GCATAACTCGGCTTAGGGCT      | 5'TCCTCTGCCTGACCTGCTAT    |

**Supplementary Table 4: A list of ER $\beta$ 2 regulated transcripts.** See Supplementary\_Table\_4

**Supplementary Table 5: A list of ER $\beta$ 5 regulated transcripts.** See Supplementary\_Table\_5

**Supplementary Table 6: A list of mutual regulated transcripts.** See Supplementary\_Table\_6

**Supplementary Table 7: A list of unique ER $\beta$ 2 regulated transcripts.** See Supplementary\_Table\_7

**Supplementary Table 8: A list of unique ER $\beta$ 5 regulated transcripts.** See Supplementary\_Table\_8
